# Supplementary material
Source: publisher figshare collection journal article supplement (https://diabetesjournals.figshare.com/ndownloader/files/28974612)
Supplement: Supplementary file 1 [file 28974612]

## Supplemental Data

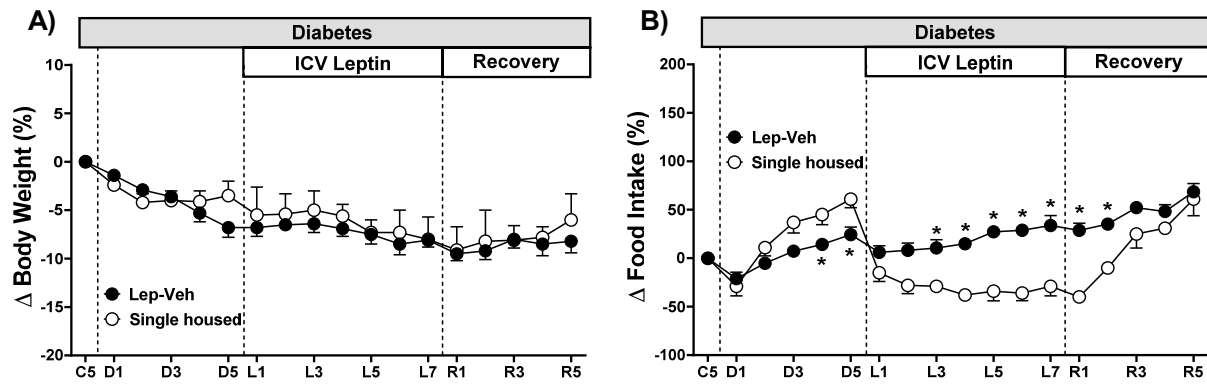

**S1.** Effects of chronic ICV leptin on body weight and food intake in parabiotic and single housed rats. *A*: Body weight and *B*: food intake data represent relative values using the last 2 days of the control period before STZ injection as baseline. Values for food intake and body weight represent the sum of the pair for Lep-Veh groups and individual values for single housed rats. \* $p < 0.05$  compared to single housed group using 2-way ANOVA.

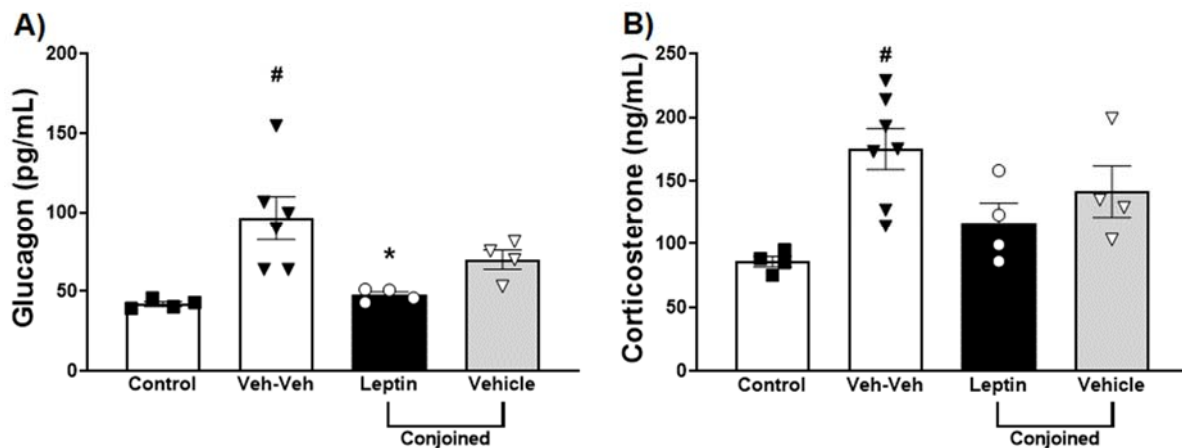

**S2.** Effects of chronic ICV leptin or vehicle infusion on plasma glucagon and corticosterone concentrations in parabiotic rats. *A*: Glucagon and *B*: corticosterone measured on the last day of treatment. \* $p < 0.05$  compared to Veh-Veh group using 1-way ANOVA; #  $p < 0.05$  compared to control non-diabetic rats using 1-way ANOVA.

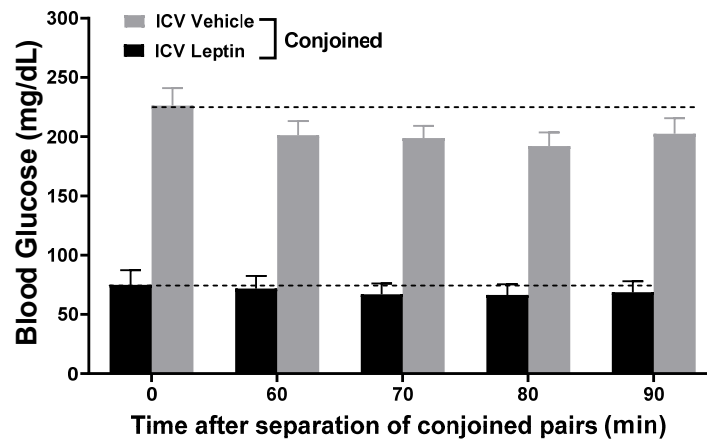

**S3.** Blood glucose levels during the whole-body gluconeogenesis protocol. Conjoined pairs of the Lep-Veh group were anesthetized and separated at time 0 min, prior to initiating the gluconeogenesis protocol, by first clamping the skin joining the pairs with two large hemostats to prevent bleeding and performing an incision between the hemostats to completely separate the conjoined pairs from their respective partners.
